# Supplementary material
Source: PubMed Central journal article supplement (PMC10330629)
Supplement: NIHMS1907453-supplement-322875_ARRIVE_Guidelines.pdf [file NIHMS1907453-supplement-322875_ARRIVE_Guidelines.pdf]

**\* ARRIVE Reporting Guidelines**

*This study involves use of animal models:*

Yes

*Manuscripts reporting on animal research are expected to adhere to the [ARRIVE](#) guidelines. A completed ARRIVE reporting guideline checklist will be required prior to acceptance and the information should be clearly presented in the manuscript. The following shortened version of the checklist should be completed at this time; a completed ARRIVE checklist is required to be uploaded during revision submission.*

**Animals**

*Species, age, sex, strain, and sources of animals are described:*

Yes

**Randomization**

*Randomization and allocation concealment were performed and described:*

Yes

**Blinding**

*Blinding was performed and the process described:*

Yes

**Inclusions and Exclusions (a)**

*Specific criteria for inclusions and exclusions are specified:*

Yes

**Inclusions and Exclusions (b)**

*Criteria for inclusions and exclusion were set before the study:*

Yes

**Reporting of Excluded Animals**

*All animals excluded after the randomization are reported:*

N/A

**Statistical Methods**

*Statistical Methods are described:*

Yes

---

Date completed: 06/05/2023 14:27:13

User pid: 706373
