# Supplementary material
Source: PubMed Central journal article supplement (PMC10330629)
Supplement: NIHMS1907453-supplement-322875_Major_Resources_Table.pdf [file NIHMS1907453-supplement-322875_Major_Resources_Table.pdf]

## Major Resources Table

In order to allow validation and replication of experiments, all essential research materials listed in the Methods should be included in the Major Resources Table below. Authors are encouraged to use public repositories for protocols, data, code, and other materials and provide persistent identifiers and/or links to repositories when available. Authors may add or delete rows as needed.

### Animals (in vivo studies)

| Species | Vendor or Source     | Background Strain | Sex  | Persistent ID / URL |
|---------|----------------------|-------------------|------|---------------------|
| Mouse   | Jackson Laboratories | C57BL6J           | Both | Stock #000664       |

### Genetically Modified Animals

| Description                | Species | Vendor or Source     | Background Strain | Other Information                                                                                                        | Persistent ID / URL |
|----------------------------|---------|----------------------|-------------------|--------------------------------------------------------------------------------------------------------------------------|---------------------|
| AHR <sup>tm3.1Bra/J</sup>  | Mouse   | Jackson Laboratories | C57BL6J           | conditional <i>Ahr</i> <sup>flx</sup> allele was generated originally from 129SvJ genome (targeting vector and ES cells) | Stock #006203       |
| Tg(ACTA1-cre/Esr1*)2Kesr/J | Mouse   | Jackson Laboratories | C57BL6J           |                                                                                                                          | Stock #025750       |

### Antibodies

| Target antigen                       | Vendor or Source                                    | Catalog # | Working concentration | Lot # (preferred but not required) | Persistent ID / URL                                                                                                                                                                                                                                                                 |
|--------------------------------------|-----------------------------------------------------|-----------|-----------------------|------------------------------------|-------------------------------------------------------------------------------------------------------------------------------------------------------------------------------------------------------------------------------------------------------------------------------------|
| Laminin                              | Millipore-Sigma                                     | L9393     | 1:100                 |                                    | <a href="https://www.sigmaaldrich.com/US/en/product/sigma/l9393">https://www.sigmaaldrich.com/US/en/product/sigma/l9393</a>                                                                                                                                                         |
| Alexa Fluor 488 goat anti-rabbit IgG | ThermoFisher                                        | A-11034   | 1:500                 |                                    | <a href="https://www.thermofisher.com/antibody/product/Goat-anti-Rabbit-IgG-H-L-Highly-Cross-Adsorbed-Secondary-Antibody-Polyclonal/A-11034">https://www.thermofisher.com/antibody/product/Goat-anti-Rabbit-IgG-H-L-Highly-Cross-Adsorbed-Secondary-Antibody-Polyclonal/A-11034</a> |
| Alexa Fluor 555 goat anti-rabbit IgG | ThermoFisher                                        | A-21428   | 1:500                 |                                    | <a href="https://www.thermofisher.com/antibody/product/Goat-anti-Rabbit-IgG-H-L-Cross-Adsorbed-Secondary-Antibody-Polyclonal/A-21428">https://www.thermofisher.com/antibody/product/Goat-anti-Rabbit-IgG-H-L-Cross-Adsorbed-Secondary-Antibody-Polyclonal/A-21428</a>               |
| Myosin heavy chain type I            | Developmental Studies Hybridoma, University of Iowa | BA-D5     | 1:50                  |                                    | <a href="https://dshb.biology.uiowa.edu/BA-D5">https://dshb.biology.uiowa.edu/BA-D5</a>                                                                                                                                                                                             |
| Myosin heavy chain type IIa          | Developmental Studies Hybridoma, University of Iowa | SC-71     | 1:50                  |                                    | <a href="https://dshb.biology.uiowa.edu/SC-71">https://dshb.biology.uiowa.edu/SC-71</a>                                                                                                                                                                                             |

|                                   |                                                     |           |        |  |                                                                                                                                                                                                                                                                                     |
|-----------------------------------|-----------------------------------------------------|-----------|--------|--|-------------------------------------------------------------------------------------------------------------------------------------------------------------------------------------------------------------------------------------------------------------------------------------|
| Myosin heavy chain type IIx       | Developmental Studies Hybridoma, University of Iowa | 6H1       | 1:50   |  | <a href="https://dshb.biology.uiowa.edu/6H1">https://dshb.biology.uiowa.edu/6H1</a>                                                                                                                                                                                                 |
| NG2                               | Millipore-Sigma                                     | AB5320    | 1:200  |  | <a href="https://www.sigmaaldrich.com/US/en/product/mm/ab5320">https://www.sigmaaldrich.com/US/en/product/mm/ab5320</a>                                                                                                                                                             |
| alpha-smooth muscle actin         | ThermoFisher                                        | 14976082  | 1:400  |  | <a href="https://www.thermofisher.com/antibody/product/Alpha-Smooth-Muscle-Actin-Antibody-clone-1A4-Monoclonal/14-9760-82">https://www.thermofisher.com/antibody/product/Alpha-Smooth-Muscle-Actin-Antibody-clone-1A4-Monoclonal/14-9760-82</a>                                     |
| AHR                               | Enzo Life Sciences                                  | BML-SA210 | 1:500  |  | <a href="https://www.enzolifesciences.com/BML-SA210/aryl-hydrocarbon-receptor-polyclonal-antibody/">https://www.enzolifesciences.com/BML-SA210/aryl-hydrocarbon-receptor-polyclonal-antibody/</a>                                                                                   |
| Oxphos Cocktail                   | Abcam                                               | ab110413  | 1:1000 |  | <a href="https://www.abcam.com/products/panels/total-oxphos-rodent-wb-antibody-cocktail-ab110413.html">https://www.abcam.com/products/panels/total-oxphos-rodent-wb-antibody-cocktail-ab110413.html</a>                                                                             |
| Gt anti-Ms IgG2b, Alexa Fluor 647 | ThermoFisher                                        | A21242    | 1:250  |  | <a href="https://www.thermofisher.com/antibody/product/Goat-anti-Mouse-IgG2b-Cross-Adsorbed-Secondary-Antibody-Polyclonal/A-21242">https://www.thermofisher.com/antibody/product/Goat-anti-Mouse-IgG2b-Cross-Adsorbed-Secondary-Antibody-Polyclonal/A-21242</a>                     |
| Gt anti-Ms IgG1, Alexa Fluor 488  | ThermoFisher                                        | A21121    | 1:250  |  | <a href="https://www.thermofisher.com/antibody/product/Goat-anti-Mouse-IgG1-Cross-Adsorbed-Secondary-Antibody-Polyclonal/A-21121">https://www.thermofisher.com/antibody/product/Goat-anti-Mouse-IgG1-Cross-Adsorbed-Secondary-Antibody-Polyclonal/A-21121</a>                       |
| Gt anti-Ms IgM, Alexa flour 555   | ThermoFisher                                        | A21426    | 1:250  |  | <a href="https://www.thermofisher.com/antibody/product/Goat-anti-Mouse-IgM-Heavy-chain-Cross-Adsorbed-Secondary-Antibody-Polyclonal/A-21426">https://www.thermofisher.com/antibody/product/Goat-anti-Mouse-IgM-Heavy-chain-Cross-Adsorbed-Secondary-Antibody-Polyclonal/A-21426</a> |
| Gt anti-Rb IgG, Alexa flour 350   | ThermoFisher                                        | A11046    | 1:250  |  | <a href="https://www.thermofisher.com/antibody/product/Goat-anti-Rabbit-IgG-H-L-Cross-Adsorbed-Secondary-Antibody-Polyclonal/A-11046">https://www.thermofisher.com/antibody/product/Goat-anti-Rabbit-IgG-H-L-Cross-Adsorbed-Secondary-Antibody-Polyclonal/A-11046</a>               |
| Gt anti-Ms IgG2a, Alexa Fluor 647 | ThermoFisher                                        | A21241    | 1:250  |  | <a href="https://www.thermofisher.com/antibody/product/Goat-anti-Mouse-IgG2a-Cross-Adsorbed-Secondary-Antibody-Polyclonal/A-21241">https://www.thermofisher.com/antibody/product/Goat-anti-Mouse-IgG2a-Cross-Adsorbed-Secondary-Antibody-Polyclonal/A-21241</a>                     |

|                                  |              |        |       |  |                                                                                                                                                                                                                                                                 |
|----------------------------------|--------------|--------|-------|--|-----------------------------------------------------------------------------------------------------------------------------------------------------------------------------------------------------------------------------------------------------------------|
| Gt anti-Rat IgG, Alexa Fluor 555 | ThermoFisher | A21434 | 1:500 |  | <a href="https://www.thermofisher.com/antibody/product/Goat-anti-Rat-IgG-H-L-Cross-Adsorbed-Secondary-Antibody-Polyclonal/A-21434">https://www.thermofisher.com/antibody/product/Goat-anti-Rat-IgG-H-L-Cross-Adsorbed-Secondary-Antibody-Polyclonal/A-21434</a> |
|----------------------------------|--------------|--------|-------|--|-----------------------------------------------------------------------------------------------------------------------------------------------------------------------------------------------------------------------------------------------------------------|

### DNA/cDNA Clones

| Clone Name     | Sequence | Source / Repository | Persistent ID / URL |
|----------------|----------|---------------------|---------------------|
| pAAV-HSA-GFP   |          | This paper.         |                     |
| pAAV-HSA-AHR   |          | This paper.         |                     |
| pAAV-HSA-CAAHR |          | This paper.         |                     |

### Cultured Cells

| Name                     | Vendor or Source | Sex (F, M, or unknown) | Persistent ID / URL                                                                         |
|--------------------------|------------------|------------------------|---------------------------------------------------------------------------------------------|
| C2C12 (Cat. No. CRL1772) | ATCC             | unknown                | <a href="https://www.atcc.org/products/crl-1772">https://www.atcc.org/products/crl-1772</a> |
| Human Muscle Cells       | This Lab         | Both Male and Female   | N/A                                                                                         |
|                          |                  |                        |                                                                                             |

### Data & Code Availability

| Description                        | Source / Repository     | Persistent ID / URL |
|------------------------------------|-------------------------|---------------------|
| snRNA sequencing data from mice    | Gene Expression Omnibus | GSE217751           |
| Bulk RNA sequencing data from mice | Gene Expression Omnibus | GSE225607           |
|                                    |                         |                     |

### Other

| Description                                                       | Source / Repository | Persistent ID / URL          |
|-------------------------------------------------------------------|---------------------|------------------------------|
| FITC-labeled inulin                                               | Millipore-Sigma     | Cat. No. F3272               |
| bicinchoninic acid protein assay                                  | ThermoFisher        | Cat No. A53225               |
| Mayers's hematoxylin                                              | Millipore-Sigma     | Cat. No. MHS1                |
| eosin                                                             | Millipore-Sigma     | Cat. No. HT110132            |
| PermOUNT                                                          | ThermoFisher        | Cat. No. SP15-500            |
| <i>Griffonia simplicifolia</i> Lectin 1 Isolectin B4, Dylight 649 | Vector Laboratories | Cat. No. DL-1208             |
| CellLytic M                                                       | Millipore-Sigma     | Cat. No. C2978               |
| Laemmli sample buffer                                             | Bio-Rad             | Cat. No. 1610737             |
| SDS-PAGE gels                                                     | Bio-Rad             | Cat. Nos. 5678044 or 4561094 |
| blocking buffer                                                   | Licor               | Cat. No. 927-60001           |
| Direct-zol RNA MiniPrep kit                                       | Zymo Research       | Cat. No. R2052               |
| LunaScript RT Supermix kit                                        | New England Biolabs | Cat. No. E3010L              |
| Luna Universal qPCR master mix                                    | New England Biolabs | Cat. No. M3003X              |
| Taqman Fast Advanced Master mix                                   | ThermoFisher        | Cat. No. 4444557             |
| Dulbecco's Modified Eagle Medium + GlutaMAX                       | Gibco               | Cat. No. 10569               |
| Fetal Bovine Serum                                                | VWR                 | Cat. No. 97068               |

|                                                       |              |                    |
|-------------------------------------------------------|--------------|--------------------|
| Penicillin/Streptomycin                               | Gibco        | Cat. No. 15140     |
| horse serum                                           | Gibco        | Cat. No. 26050     |
| insulin/transferrin/selenium                          | Gibco        | Cat. No. 41400     |
| Chromium Next GEM Single Cell 3' HT Reagent kits v3.1 | 10x Genomics | Cat. No. PN-100370 |
| Chromium nuclei isolation kit                         | 10x Genomics | Cat. No. PN-100494 |

| <b>Primers and Probes for mRNA analysis</b> |             |                  |                                     |
|---------------------------------------------|-------------|------------------|-------------------------------------|
| <b>Species</b>                              | <b>Gene</b> | <b>Chemistry</b> | <b>Sequence or Product Number</b>   |
| Mus<br>Musculus                             | Ahr         | Sybr Green       | 5' – TTCCAGGTTCTCAGGCATTC – 3'      |
|                                             |             |                  | 5' – TGGGAGCTACAGGAATCCAC – 3'      |
| Mus<br>Musculus                             | Cyp1a1      | Sybr Green       | 5' – CAGCCTTCCCAAATGGTTTA – 3'      |
|                                             |             |                  | 5' – GCCTGGGCTACACAAGACTC – 3'      |
| Mus<br>Musculus                             | L32         | Sybr Green       | 5' – TTCCTGGTCCACAATGTCAA – 3'      |
|                                             |             |                  | 5' – GGCTTTTCGGTTCCTTAGAGGA – 3'    |
| Mus<br>Musculus                             | Cox7a1      | Sybr Green       | 5' – GCTCTGGTCCGGTCTTTTAGC – 3'     |
|                                             |             |                  | 5' – GTACTGGGAGGTCATTGTCGG – 3'     |
| Mus<br>Musculus                             | Cox8        | Sybr Green       | 5' – GCGAAGTTCACAGTGGTTC – 3'       |
|                                             |             |                  | 5' – GGAACCATGAAGCCAACGAC – 3'      |
| Mus<br>Musculus                             | Atp5k       | Sybr Green       | 5' – GTTCAGGTCTCTCCACTCATCA – 3'    |
|                                             |             |                  | 5' – CGGGGTTTTAGGTAAGTGTAGC – 3'    |
| Mus<br>Musculus                             | Atp5d       | Sybr Green       | 5' – TGCTTCAGGCGCGTACATAC – 3'      |
|                                             |             |                  | 5' – CACTTGCTTGACGTTGGCA – 3'       |
| Mus<br>Musculus                             | Cs          | Sybr Green       | 5' – GGACAATTTCCAACCAATCTGC – 3'    |
|                                             |             |                  | 5' – TCGGTTCAATCCCTCTGCATA – 3'     |
| Mus<br>Musculus                             | Ndufa5      | Sybr Green       | 5' – AGCTGGATATGGTCAAGGCG – 3'      |
|                                             |             |                  | 5' – GCCACTTCCACTGGTTAGCA – 3'      |
| Mus<br>Musculus                             | Tfam        | Sybr Green       | 5' – ATTCCGAAGTGTTTTCCAGCA – 3'     |
|                                             |             |                  | 5' – TCTGAAAGTTTTGCATCTGGGT – 3'    |
| Mus<br>Musculus                             | Sod2        | Sybr Green       | 5' – ACAACCTGAGCCCTAAGGGT – 3'      |
|                                             |             |                  | 5' – GAACCTTGACTCCCACAGAC – 3'      |
| Mus<br>Musculus                             | Pdha1       | Sybr Green       | 5' – GAAATGTGACCTTCATCGGCT – 3'     |
|                                             |             |                  | 5' – TGATCCGCCTTAGCTCCATC – 3'      |
| Mus<br>Musculus                             | Sdhb        | Sybr Green       | 5' – AATTTGCCATTTACCGATGGGA – 3'    |
|                                             |             |                  | 5' – AGCATCCAACACCATAGGTCC – 3'     |
| Mus<br>Musculus                             | Hif1a       | Sybr Green       | 5' – GGGGAGGACGATGAACATCAA – 3'     |
|                                             |             |                  | 5' – GGGTGGTTTTCTTGTACCCACA – 3'    |
| Mus<br>Musculus                             | Vegfa       | Sybr Green       | 5' – CGAGATAGAGTACATCTTCAAGCC – 3'  |
|                                             |             |                  | 5' – TCATCGTTACAGCAGCCTGC – 3'      |
| Mus<br>Musculus                             | Vegfb       | Sybr Green       | 5' – TGCCATGGATAGACGTTTATGC – 3'    |
|                                             |             |                  | 5' – TGCTCAGAGGCACCACCAC – 3'       |
| Mus<br>Musculus                             | Vegf121     | Sybr Green       | 5' – TGCAGGCTGCTGTAACGATG – 3'      |
|                                             |             |                  | 5' – CCTCGGCTTGTCACATTTTTCT – 3'    |
| Mus<br>Musculus                             | Vegf165     | Sybr Green       | 5' – TGCAGGCTGCTGTAACGATG – 3'      |
|                                             |             |                  | 5' – GAACAAGGCTCACAGTGATTTTTCT – 3' |
| Mus<br>Musculus                             | Angpt1      | Sybr Green       | 5' – CATTCTTCGCTGCCATTCTG – 3'      |
|                                             |             |                  | 5' – GCACATTGCCCATGTTGAATC – 3'     |
| Mus<br>Musculus                             | Angpt2      | Sybr Green       | 5' – TTAGCACAAAGGATTCGGACAAT – 3'   |
|                                             |             |                  | 5' – TTTTGTGGGTAGTACTGTCCATTCA – 3' |

|                                                                                   |             |                            |                                    |
|-----------------------------------------------------------------------------------|-------------|----------------------------|------------------------------------|
| Mus<br>Musculus                                                                   | Dl14        | Sybr Green                 | 5' – AGGTGCCACTTCGGTTACAC – 3'     |
|                                                                                   |             |                            | 5' – GGGAGAGCAAATGGCTGATA – 3'     |
| Mus<br>Musculus                                                                   | Egf         | Sybr Green                 | 5' – AGCATCTCTCGGATTGACCCA – 3'    |
|                                                                                   |             |                            | 5' – CCTGTCCCGTTAAGGAAAACCTCT – 3' |
| Mus<br>Musculus                                                                   | Nos2        | Sybr Green                 | 5' – CAGCTGGGCTGTACAAACCTT – 3'    |
|                                                                                   |             |                            | 5' – CATTGGAAGTGAAGCGTTTCG – 3'    |
| Mus<br>Musculus                                                                   | Edn1        | Sybr Green                 | 5' – GCACCGGAGCTGAGAATGG – 3'      |
|                                                                                   |             |                            | 5' – GTGGCAGAAGTAGACACACTC – 3'    |
| Homo<br>Sapiens                                                                   | Cyp1a1      | Sybr Green                 | 5' – GATTGAGCACTGTCAGGAGAAGC – 3'  |
|                                                                                   |             |                            | 5' – ATGAGGCTCCAGGAGATAGCAG – 3'   |
| Homo<br>Sapiens                                                                   | L32         | Sybr Green                 | 5' – GTCAAGGAGCTGGAAGTGCT – 3'     |
|                                                                                   |             |                            | 5' – CTCTTTCCACGATGGCTTTG – 3'     |
| Mus<br>Musculus                                                                   | Ahr         | Taqman                     | Mm00478932_m1                      |
| Mus<br>Musculus                                                                   | Cyp1a1      | Taqman                     | Mm00487218_m1                      |
| Homo<br>Sapiens                                                                   | Ahr         | Taqman                     | Hs00169233_m1                      |
| Homo<br>Sapiens                                                                   | Cyp1a1      | Taqman                     | Hs01054796_g1                      |
| Homo<br>Sapiens                                                                   | Cyp1b1      | Taqman                     | Hs00164383_m1                      |
| Homo<br>Sapiens                                                                   | Nqo1        | Taqman                     | Hs01045993_g1                      |
| Homo<br>Sapiens                                                                   | Aldh3a1     | Taqman                     | Hs00964880_m1                      |
| Homo<br>Sapiens                                                                   | Ahrr        | Taqman                     | Hs01005075_m1                      |
| Homo<br>Sapiens                                                                   | 18S         | Taqman                     | Hs99999901_s1                      |
| <b>Primers used for Validation of DNA Recombination in AHR<sup>mkO</sup> mice</b> |             |                            |                                    |
| <b>Species</b>                                                                    | <b>Gene</b> | <b>Primer<br/>Location</b> | <b>Sequence</b>                    |
| Mus<br>Musculus                                                                   | Ahr         | Forward                    | 5' – ATCTTGTGTCAGGAACAGGCCATC – 3' |
|                                                                                   |             | Reverse                    | 5' – GGTACAAGTGCACATGCCTGC – 3'    |

## ARRIVE GUIDELINES

The ARRIVE guidelines (<https://arriveguidelines.org/>) are a checklist of recommendations to improve the reporting of research involving animals. Key elements of the study design should be included below to better enable readers to scrutinize the research adequately, evaluate its methodological rigor, and reproduce the methods or findings.

### Study Design

| Groups                         | Sex  | Age     | Littermates (Yes/No) | Other description                        |
|--------------------------------|------|---------|----------------------|------------------------------------------|
| AHR <sup>fl/fl</sup> (Casein)  | Both | 4-6 mo. | Yes                  | Floxed control without CKD               |
| AHR <sup>fl/fl</sup> (Adenine) | Both | 4-6 mo. | Yes                  | Floxed control with CKD                  |
| AHR <sup>mKO</sup> (Casein)    | Both | 4-6 mo. | Yes                  | Muscle-specific AHR knockout without CKD |
| AHR <sup>mKO</sup> (Adenine)   | Both | 4-6 mo. | Yes                  | Muscle-specific AHR knockout with CKD    |
| AAV-HSA-GFP                    | Both | 4 mo.   | Yes                  | C57BL6J mice infected with AAV-HSA-GFP   |
| AAV-HSA-AHR                    | Both | 4 mo.   | Yes                  | C57BL6J mice infected with AAV-HSA-AHR   |
| AAV-HSA-CAAHR                  | Both | 4 mo.   | Yes                  | C57BL6J mice infected with AAV-HSA-CAAHR |

**Sample Size:** An any a *prior* sample size estimation was performed based on detecting a 20% difference in peak specific force (muscle function) in the surgically ischemic EDL muscle. Using a two-way ANOVA ( $\alpha=0.05$ ,  $\text{power}=0.8$ ,  $\text{groups}=8$ ) indicates that a sample size of 12 mice/group/sex will be necessary to adequately power the muscle AHR knockout experiments using an effect size of  $F = 0.429$  (determined from previous HLI muscle function data). An additional 8-12 animals/group were planned inclusions due to incompatibility of muscle/vascular staining procedures to assess muscle/vascular regeneration.

**Inclusion Criteria.** None.

**Exclusion Criteria.** None.

**Randomization.** Mice were randomized to treatments based on body weight prior to intervention.

**Blinding.** Both experimenters and surgeon were blinded to the treatment and/or interventional groups until data analysis was completed.
