# Supplementary material
Source: PubMed Central journal article supplement (PMC10330629)
Supplement: NIHMS1907453-supplement-322875_Uncut_Gel_Blots.pdf [file NIHMS1907453-supplement-322875_Uncut_Gel_Blots.pdf]

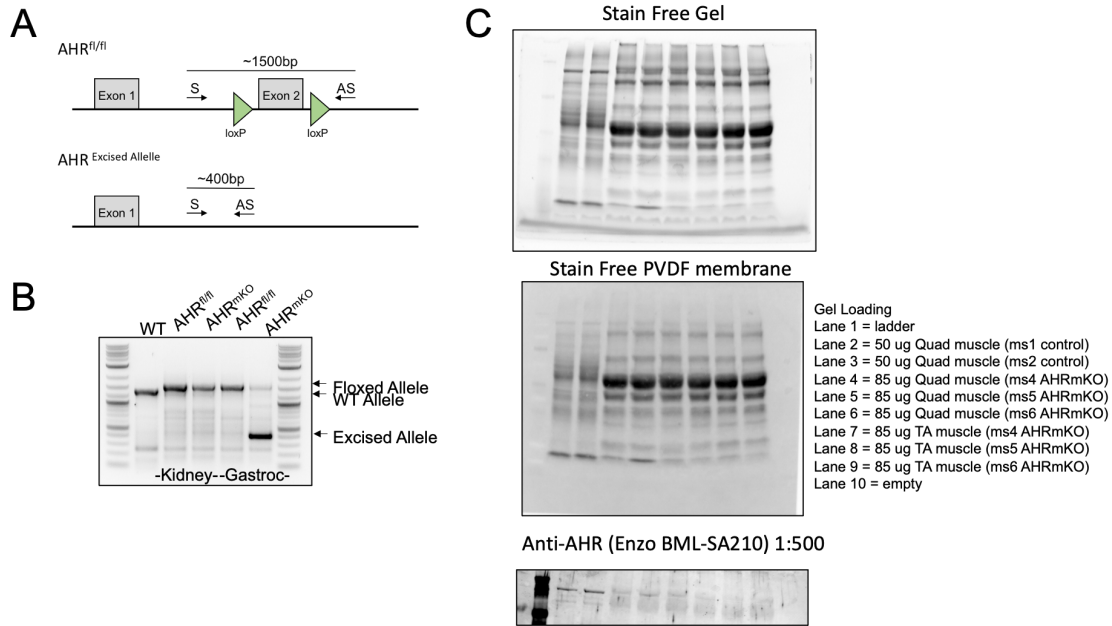

**Uncropped blots related to Figure 1. (A)** Graphical depiction of primer design used to confirm DNA recombination. **(B)** DNA gel confirming muscle-specific recombination in the AHR gene in AHR<sup>mKO</sup> mice treated with tamoxifen. **(C)** Uncropped gels and membranes for immunoblotting confirmation of AHR deletion in skeletal muscle.

| Lane | Genotype       | Sex    | Diet    |
|------|----------------|--------|---------|
| 1    | Ladder         |        |         |
| 2    | Ahr- <i>fl</i> | Male   | Adenine |
| 3    | Ahr- <i>fl</i> | Male   | Adenine |
| 4    | Ahr- <i>fl</i> | Female | Adenine |
| 5    | Ahr- <i>fl</i> | Female | Adenine |
| 6    | Ahr- <i>fl</i> | Male   | Casein  |
| 7    | Ahr- <i>fl</i> | Male   | Casein  |
| 8    | Ahr- <i>fl</i> | Female | Casein  |
| 9    | Ahr- <i>fl</i> | Female | Casein  |
| 10   | Ahr-mKO        | Male   | Adenine |
| 11   | Ahr-mKO        | Male   | Adenine |
| 12   | Ahr-mKO        | Female | Adenine |
| 13   | Ahr-mKO        | Female | Adenine |
| 14   | Ahr-mKO        | Male   | Casein  |
| 15   | Ahr-mKO        | Male   | Casein  |
| 16   | Ahr-mKO        | Female | Casein  |
| 17   | Ahr-mKO        | Female | Casein  |
| 18   | EMPTY          |        |         |

| Lane | Genotype       | Sex    | Diet    |
|------|----------------|--------|---------|
| 1    | Ladder         |        |         |
| 2    | Ahr- <i>fl</i> | Female | Adenine |
| 3    | Ahr- <i>fl</i> | Female | Adenine |
| 4    | Ahr- <i>fl</i> | Male   | Adenine |
| 5    | Ahr- <i>fl</i> | Male   | Adenine |
| 6    | Ahr-mKO        | Female | Adenine |
| 7    | Ahr-mKO        | Female | Adenine |
| 8    | Ahr-mKO        | Male   | Adenine |
| 9    | Ahr-mKO        | Male   | Adenine |
| 10   | Ahr- <i>fl</i> | Female | Casein  |
| 11   | Ahr- <i>fl</i> | Female | Casein  |
| 12   | Ahr- <i>fl</i> | Male   | Casein  |
| 13   | Ahr- <i>fl</i> | Male   | Casein  |
| 14   | Ahr-mKO        | Female | Casein  |
| 15   | Ahr-mKO        | Female | Casein  |
| 16   | Ahr-mKO        | Male   | Casein  |
| 17   | Ahr-mKO        | Male   | Casein  |
| 18   | EMPTY          |        |         |

| Lane | Genotype       | Sex    | Diet    |
|------|----------------|--------|---------|
| 1    | Ladder         |        |         |
| 2    | Ahr- <i>fl</i> | Female | Casein  |
| 3    | Ahr- <i>fl</i> | Female | Casein  |
| 4    | Ahr- <i>fl</i> | Male   | Casein  |
| 5    | Ahr- <i>fl</i> | Male   | Casein  |
| 6    | Ahr-mKO        | Female | Casein  |
| 7    | Ahr-mKO        | Female | Casein  |
| 8    | Ahr-mKO        | Male   | Casein  |
| 9    | Ahr-mKO        | Male   | Casein  |
| 10   | Ahr- <i>fl</i> | Female | Adenine |
| 11   | Ahr- <i>fl</i> | Female | Adenine |
| 12   | Ahr- <i>fl</i> | Male   | Adenine |
| 13   | Ahr- <i>fl</i> | Male   | Adenine |
| 14   | Ahr-mKO        | Female | Adenine |
| 15   | Ahr-mKO        | Female | Adenine |
| 16   | Ahr-mKO        | Male   | Adenine |
| 17   | Ahr-mKO        | Male   | Adenine |
| 18   | EMPTY          |        |         |

| Lane | Genotype       | Sex    | Diet    |
|------|----------------|--------|---------|
| 1    | Ladder         |        |         |
| 2    | Ahr- <i>fl</i> | Male   | Casein  |
| 3    | Ahr- <i>fl</i> | Male   | Casein  |
| 4    | Ahr- <i>fl</i> | Female | Casein  |
| 5    | Ahr- <i>fl</i> | Female | Casein  |
| 6    | Ahr-mKO        | Male   | Casein  |
| 7    | Ahr-mKO        | Male   | Casein  |
| 8    | Ahr-mKO        | Female | Casein  |
| 9    | Ahr-mKO        | Female | Casein  |
| 10   | Ahr- <i>fl</i> | Male   | Adenine |
| 11   | Ahr- <i>fl</i> | Male   | Adenine |
| 12   | Ahr- <i>fl</i> | Female | Adenine |
| 13   | Ahr- <i>fl</i> | Female | Adenine |
| 14   | Ahr-mKO        | Male   | Adenine |
| 15   | Ahr-mKO        | Male   | Adenine |
| 16   | Ahr-mKO        | Female | Adenine |
| 17   | Ahr-mKO        | Female | Adenine |
| 18   | EMPTY          |        |         |

ATP5a (55kDa)  
UQCRC2 (48kDa)  
MTCO1 (40kDa)  
NDUFB8 (40kDa)

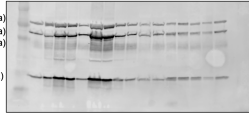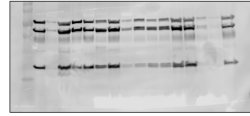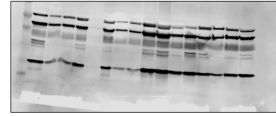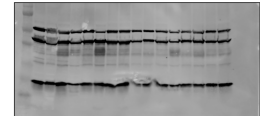

Total Protein  
on PVDF  
Membrane

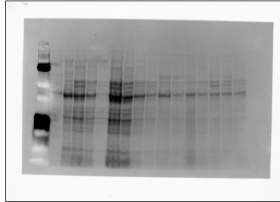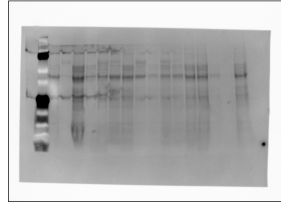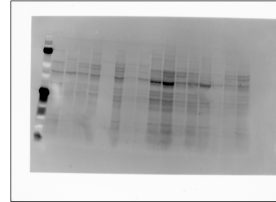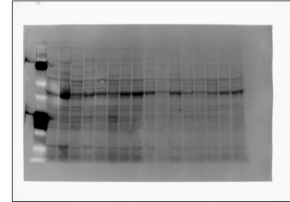

**Uncropped western blots for AHR<sup>fl/fl</sup> and AHR<sup>mKO</sup> mitochondrial protein abundance in the ischemic limb.**

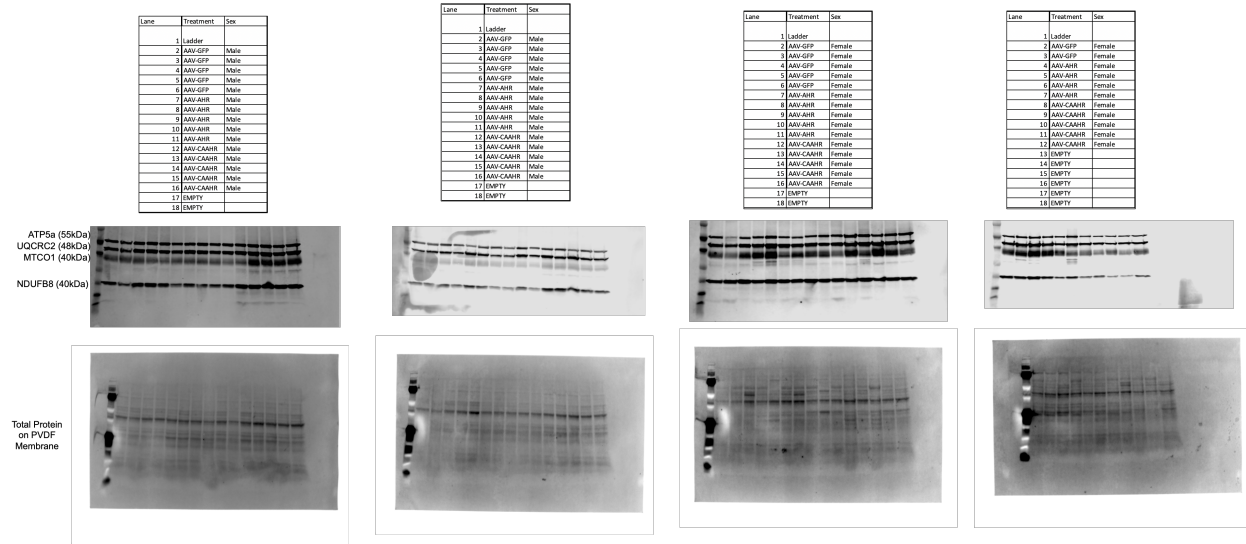

Uncropped western blots for AAV treated mice examining mitochondrial protein abundance in the ischemic limb.
